# Supplementary material for: Synthesis of disubstituted furans catalysed by [(AuCl)2(μ-bis(phosphino)metallocene)] and Na[BArF24]
Source: Royal Society of Chemistry journal article supplement (doi:10.1039/d2dt02999e), 2022-01-01
Supplement: d2dt02999e1.pdf [file d2dt02999e1.pdf]

## Synthesis of disubstituted furans catalysed by [(AuCl)<sub>2</sub>(μ-bis(phosphino)metallocene)] and Na[BARF<sub>24</sub>]

Reilly K. Gwinn, Anna E. Boggess, Elizabeth P. Winter and Chip Nataro\*

### Supporting Information

| Fig. | Table |                                                                                                            | Pg. |
|------|-------|------------------------------------------------------------------------------------------------------------|-----|
| S1   |       | <sup>1</sup> H NMR spectrum of [(AuCl) <sub>2</sub> (μ-dppr)] in CDCl <sub>3</sub> .                       | S2  |
| S2   |       | <sup>1</sup> H COSY NMR spectrum of [(AuCl) <sub>2</sub> (μ-dppr)] in CDCl <sub>3</sub> .                  | S3  |
| S3   |       | <sup>31</sup> P{ <sup>1</sup> H} NMR spectrum of [(AuCl) <sub>2</sub> (μ-dppr)] in CDCl <sub>3</sub> .     | S4  |
| S4   |       | <sup>13</sup> C{ <sup>1</sup> H} NMR spectrum of [(AuCl) <sub>2</sub> (μ-dppr)] in CDCl <sub>3</sub> .     | S5  |
| S5   |       | DEPT-135 <sup>13</sup> C NMR spectrum of [(AuCl) <sub>2</sub> (μ-dppr)] in CDCl <sub>3</sub> .             | S6  |
| S6   |       | <sup>13</sup> C- <sup>1</sup> H HMBC NMR spectrum of [(AuCl) <sub>2</sub> (μ-dppr)] in CDCl <sub>3</sub> . | S7  |
| S7   |       | <sup>13</sup> C- <sup>1</sup> H HSQC NMR spectrum of [(AuCl) <sub>2</sub> (μ-dppr)] in CDCl <sub>3</sub> . | S8  |
| S8   |       | <sup>1</sup> H NMR spectrum of [(AuCl) <sub>2</sub> (μ-dppo)] in CDCl <sub>3</sub> .                       | S9  |
| S9   |       | <sup>1</sup> H COSY NMR spectrum of [(AuCl) <sub>2</sub> (μ-dppo)] in CDCl <sub>3</sub> .                  | S10 |
| S10  |       | <sup>31</sup> P{ <sup>1</sup> H} NMR spectrum of [(AuCl) <sub>2</sub> (μ-dppo)] in CDCl <sub>3</sub> .     | S11 |
| S11  |       | <sup>13</sup> C{ <sup>1</sup> H} NMR spectrum of [(AuCl) <sub>2</sub> (μ-dppo)] in CDCl <sub>3</sub> .     | S12 |
| S12  |       | DEPT-135 <sup>13</sup> C NMR spectrum of [(AuCl) <sub>2</sub> (μ-dppo)] in CDCl <sub>3</sub> .             | S13 |
| S13  |       | <sup>13</sup> C- <sup>1</sup> H HMBC NMR spectrum of [(AuCl) <sub>2</sub> (μ-dppo)] in CDCl <sub>3</sub> . | S14 |
| S14  |       | <sup>13</sup> C- <sup>1</sup> H HSQC NMR spectrum of [(AuCl) <sub>2</sub> (μ-dppo)] in CDCl <sub>3</sub> . | S15 |
|      | S1    | Crystallographic data for [(AuCl) <sub>2</sub> (μ-dppr)] and [(AuCl) <sub>2</sub> (μ-dppo)].               | S16 |
| S15  |       | SambVca results for [(AuCl) <sub>2</sub> (μ-dppr)].                                                        | S17 |
| S16  |       | SambVca results for [(AuCl) <sub>2</sub> (μ-dppo)].                                                        | S18 |
|      |       | Characterization of furan products                                                                         | S19 |
| S17  |       | Proton (left) and carbon (right) numbering scheme for 2,4-di(2-pyridyl)furan.                              | S20 |
| S18  |       | <sup>1</sup> H NMR spectrum of 2,4-di(2-pyridyl)furan in CDCl <sub>3</sub> .                               | S21 |
| S19  |       | <sup>13</sup> C{ <sup>1</sup> H} NMR spectrum of 2,4-di(2-pyridyl)furan in CDCl <sub>3</sub> .             | S22 |
| S20  |       | <sup>13</sup> C DEPT NMR spectrum of 2,4-di(2-pyridyl)furan in CDCl <sub>3</sub> .                         | S23 |
| S21  |       | <sup>13</sup> C- <sup>1</sup> H HMBC NMR spectrum of 2,4-di(2-pyridyl)furan in CDCl <sub>3</sub> .         | S24 |
| S22  |       | <sup>13</sup> C- <sup>1</sup> H HSQC NMR spectrum of 2,4-di(2-pyridyl)furan in CDCl <sub>3</sub> .         | S25 |
| S23  |       | Predicted <sup>1</sup> H NMR spectrum of 2,4-di(2-pyridyl)furan in CDCl <sub>3</sub> .                     | S26 |
| S24  |       | Predicted <sup>13</sup> C{ <sup>1</sup> H} NMR spectrum of 2,4-di(2-pyridyl)furan in CDCl <sub>3</sub> .   | S27 |
|      |       | References                                                                                                 | S28 |

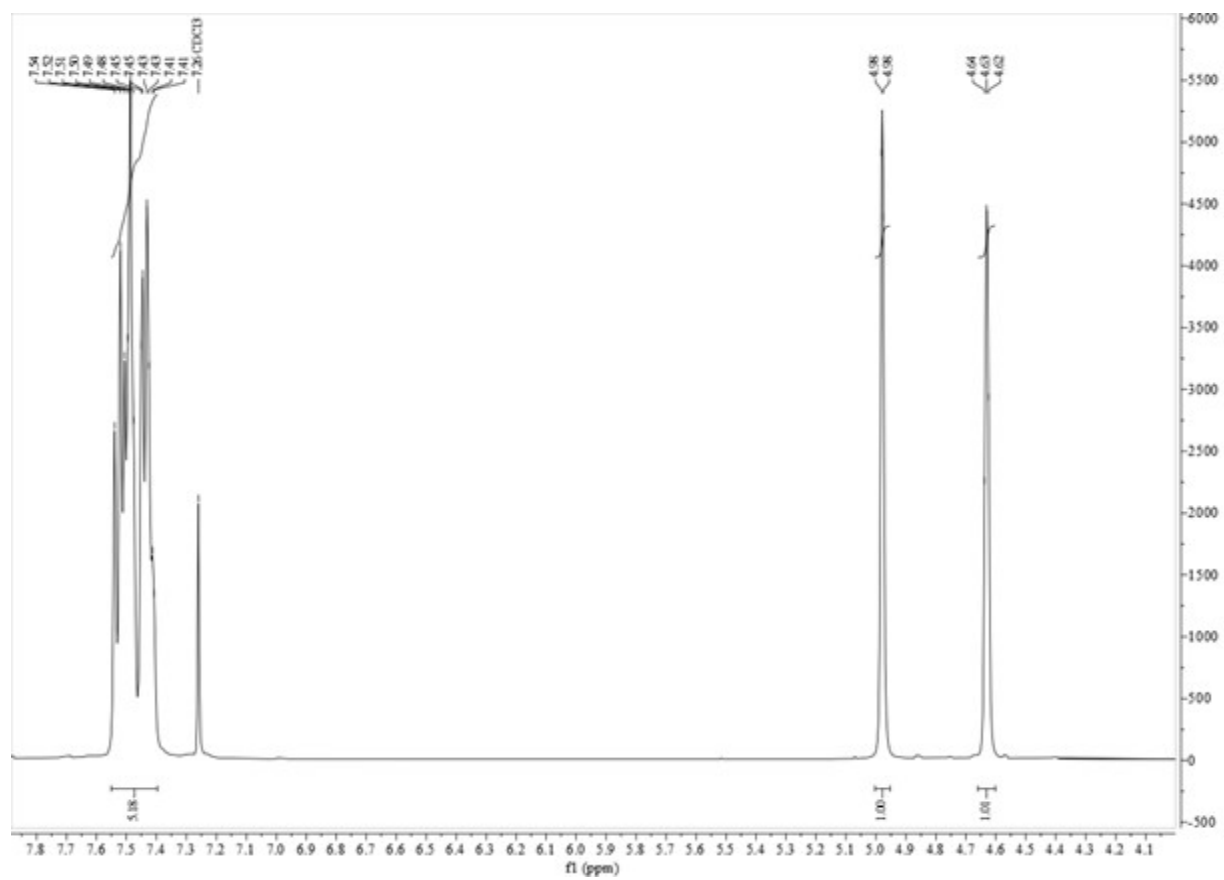

**Fig. S1.**  $^1\text{H}$  NMR spectrum of  $[(\text{AuCl})_2(\mu\text{-dppr})]$  in  $\text{CDCl}_3$ .

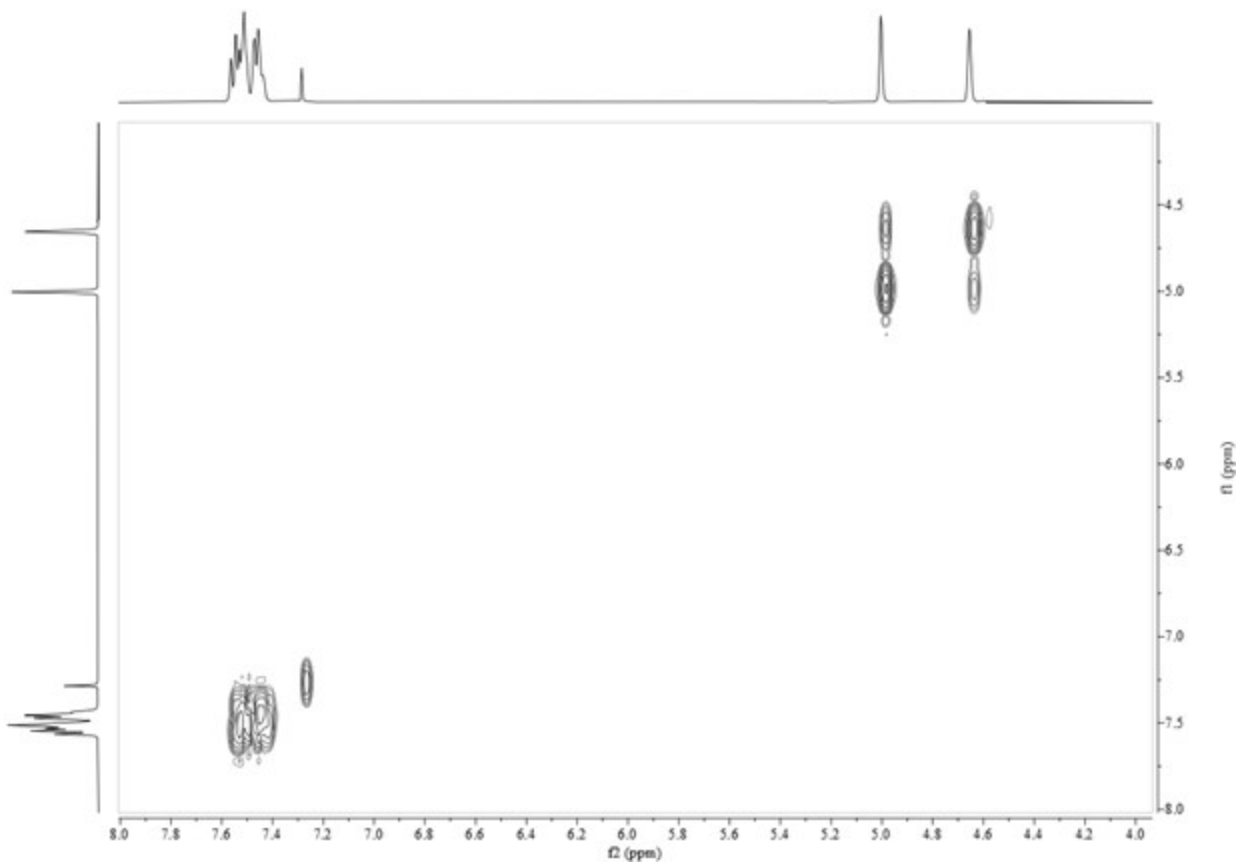

**Fig. S2.** <sup>1</sup>H COSY NMR spectrum of [(AuCl)<sub>2</sub>(μ-dppr)] in CDCl<sub>3</sub>.

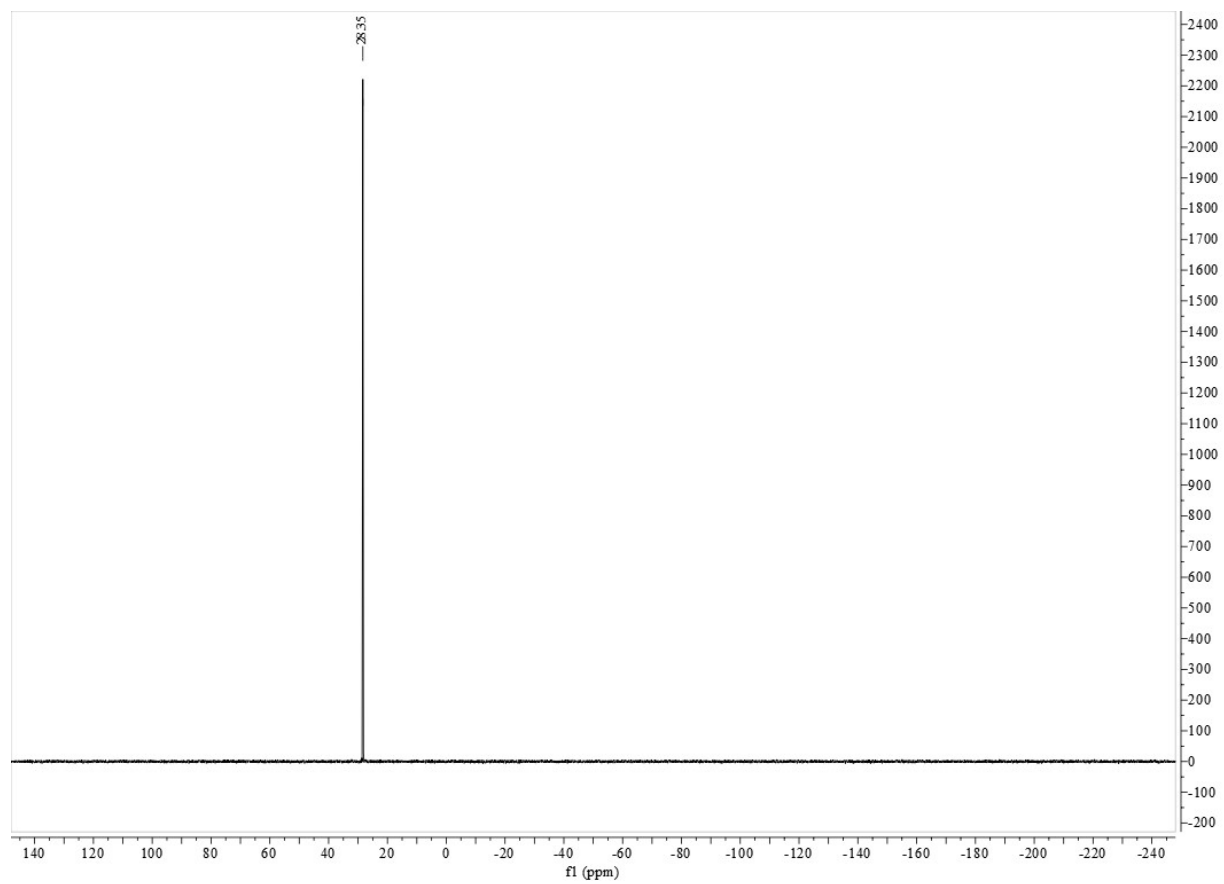

**Fig. S3.**  $^{31}\text{P}\{^1\text{H}\}$  NMR spectrum of  $[(\text{AuCl})_2(\mu\text{-dppr})]$  in  $\text{CDCl}_3$ .

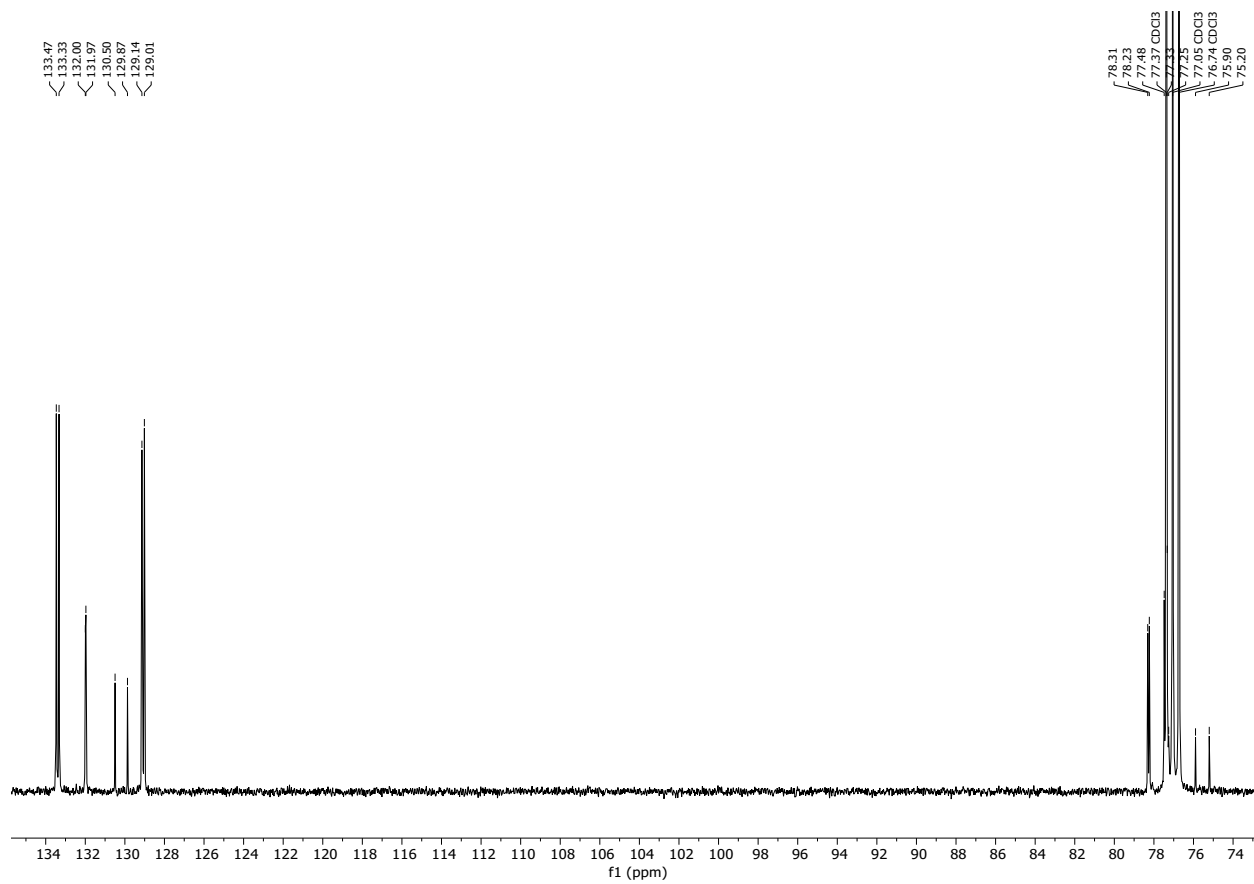

**Fig. S4.**  $^{13}\text{C}\{^1\text{H}\}$  NMR spectrum of  $[(\text{AuCl})_2(\mu\text{-dppr})]$  in  $\text{CDCl}_3$ .

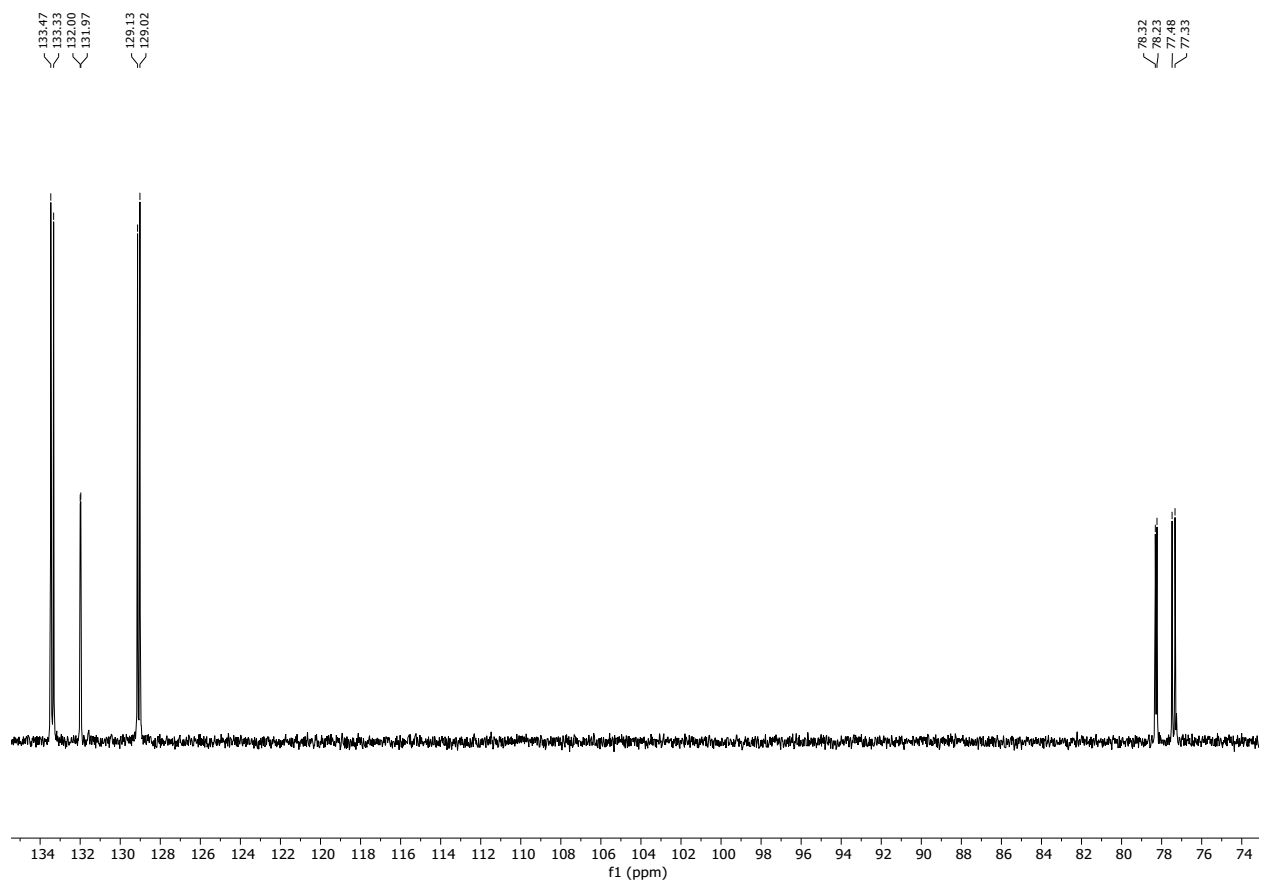

**Fig. S5.** DEPT-135  $^{13}\text{C}$  NMR spectrum of  $[(\text{AuCl})_2(\mu\text{-dppr})]$  in  $\text{CDCl}_3$ .

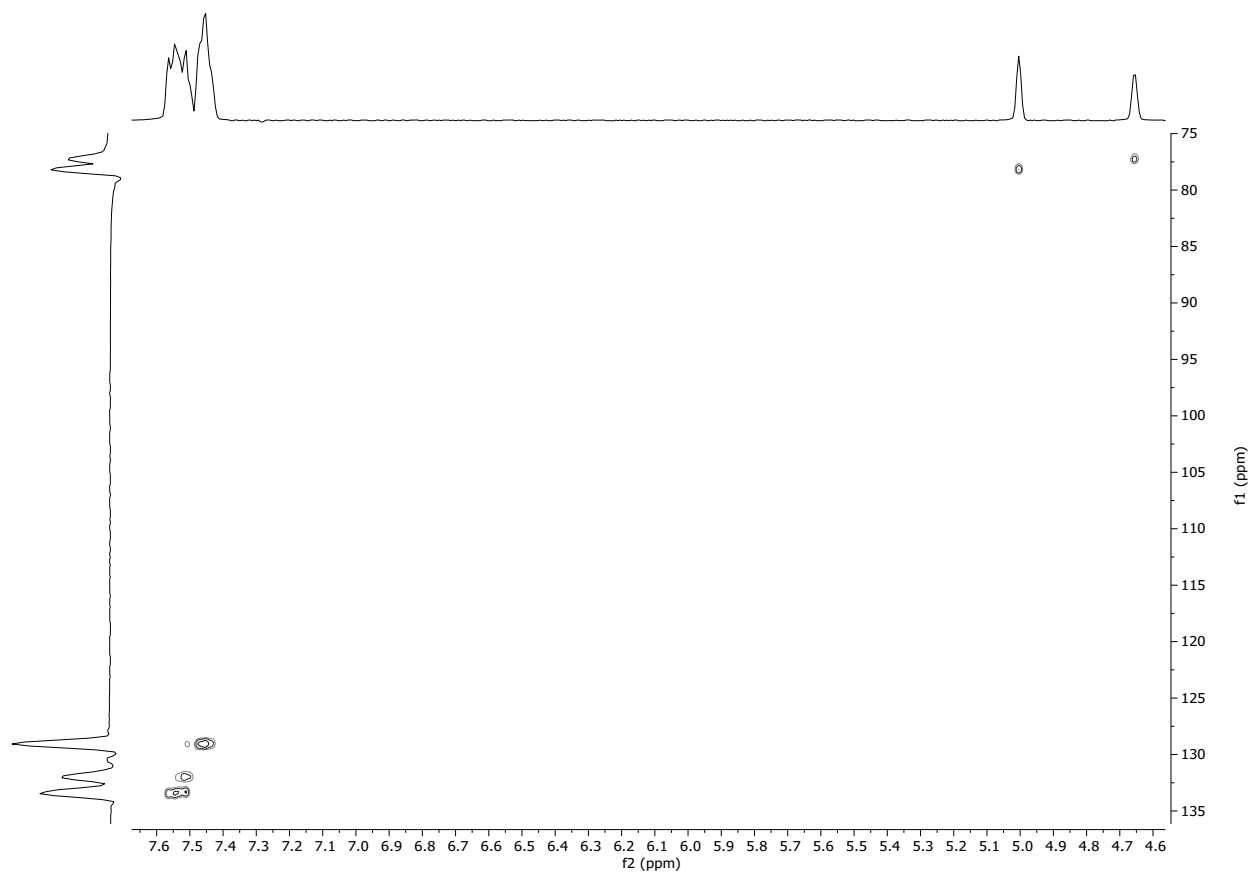

**Fig. S6.**  $^{13}\text{C}$ - $^1\text{H}$  HMBC NMR spectrum of  $[(\text{AuCl})_2(\mu\text{-dppr})]$  in  $\text{CDCl}_3$ .

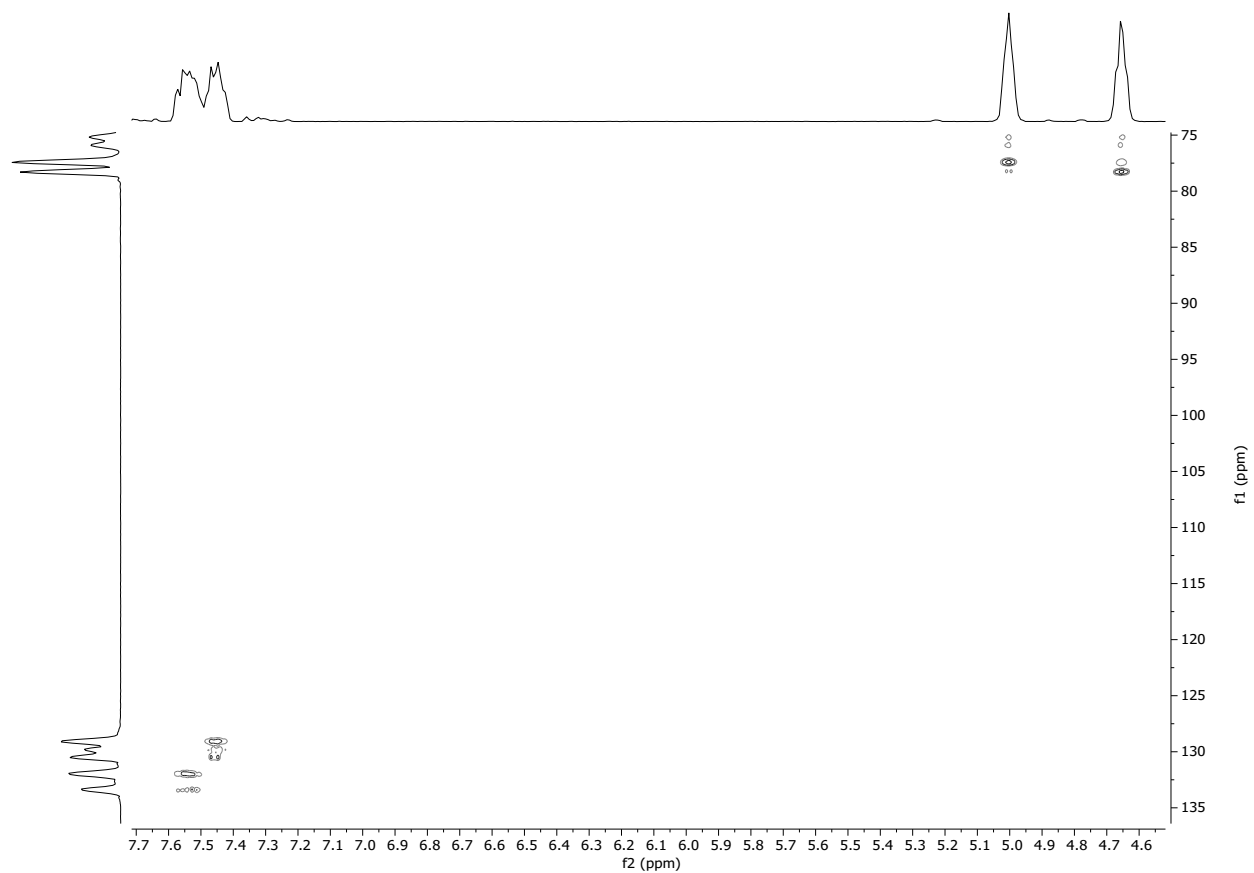

**Fig. S7.** <sup>13</sup>C-<sup>1</sup>H HSQC NMR spectrum of [(AuCl)<sub>2</sub>(μ-dppr)] in CDCl<sub>3</sub>.



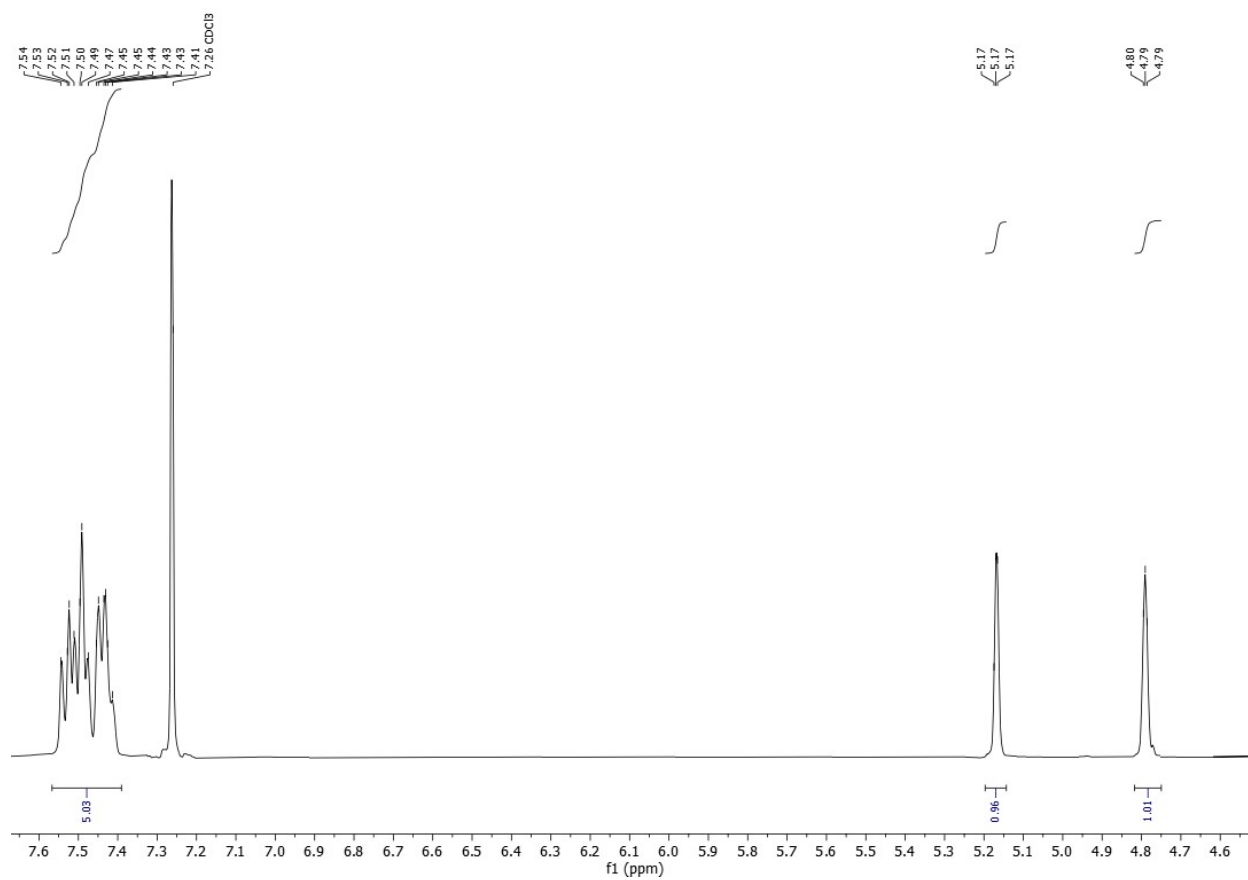

**Fig. S8.**  $^1\text{H}$  NMR spectrum of  $[(\text{AuCl})_2(\mu\text{-dppo})]$  in  $\text{CDCl}_3$ .

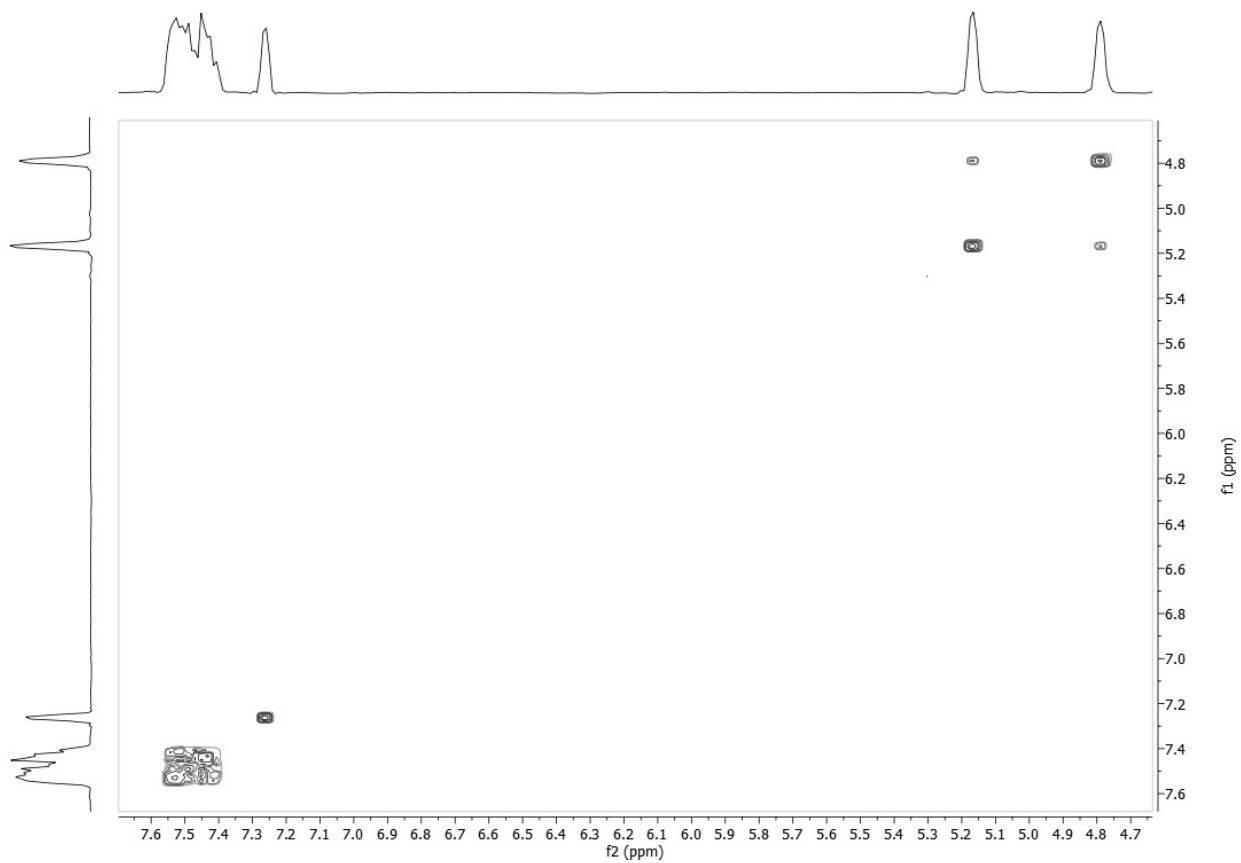

**Fig. S9.** <sup>1</sup>H COSY NMR spectrum of [(AuCl)<sub>2</sub>(μ-dppo)] in CDCl<sub>3</sub>.

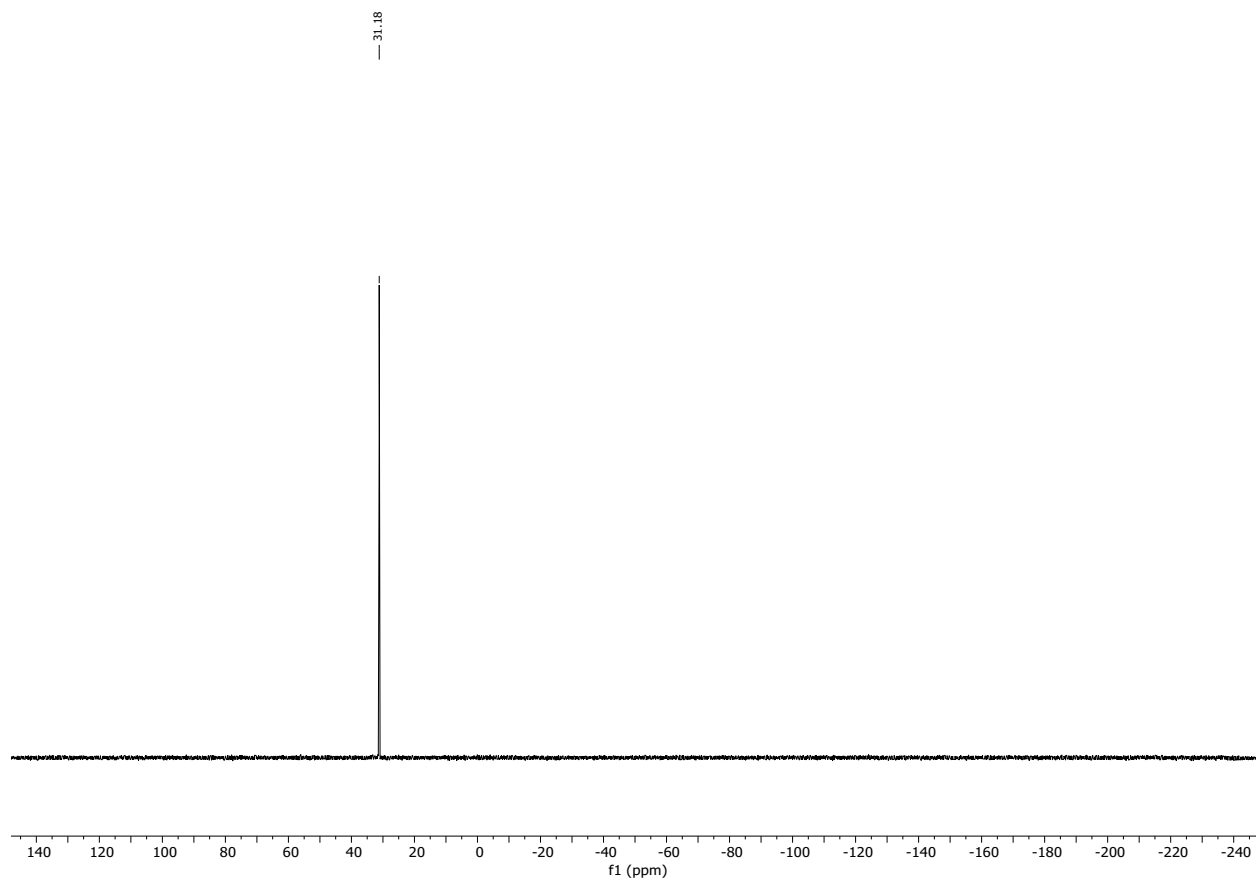

**Fig. S10.**  $^{31}\text{P}\{^1\text{H}\}$  NMR spectrum of  $[(\text{AuCl})_2(\mu\text{-dppo})]$  in  $\text{CDCl}_3$

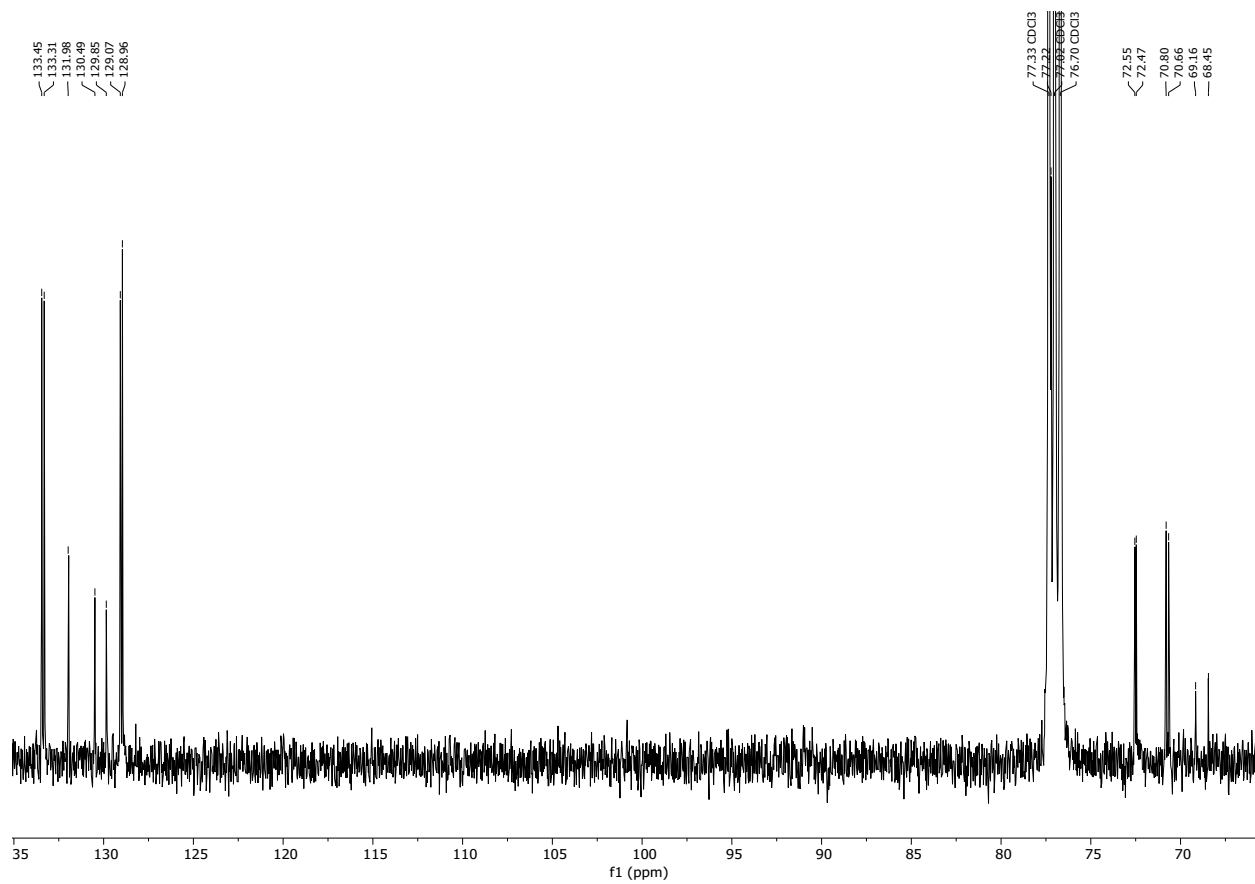

**Fig. S11.**  $^{13}\text{C}\{^1\text{H}\}$  NMR spectrum of  $[(\text{AuCl})_2(\mu\text{-dppo})]$  in  $\text{CDCl}_3$ .

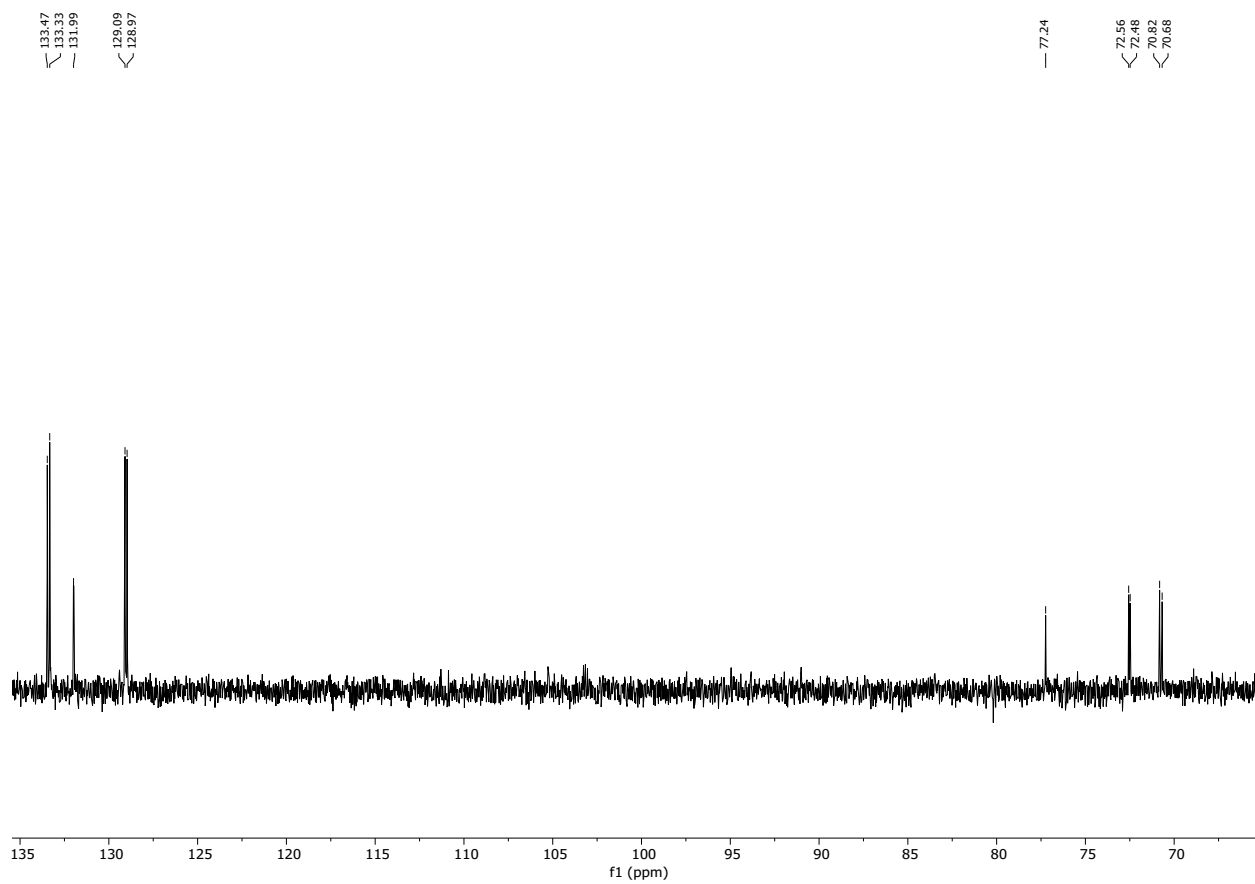

**Fig. S12.** DEPT-135  $^{13}\text{C}$  NMR spectrum of  $[(\text{AuCl})_2(\mu\text{-dppo})]$  in  $\text{CDCl}_3$ .

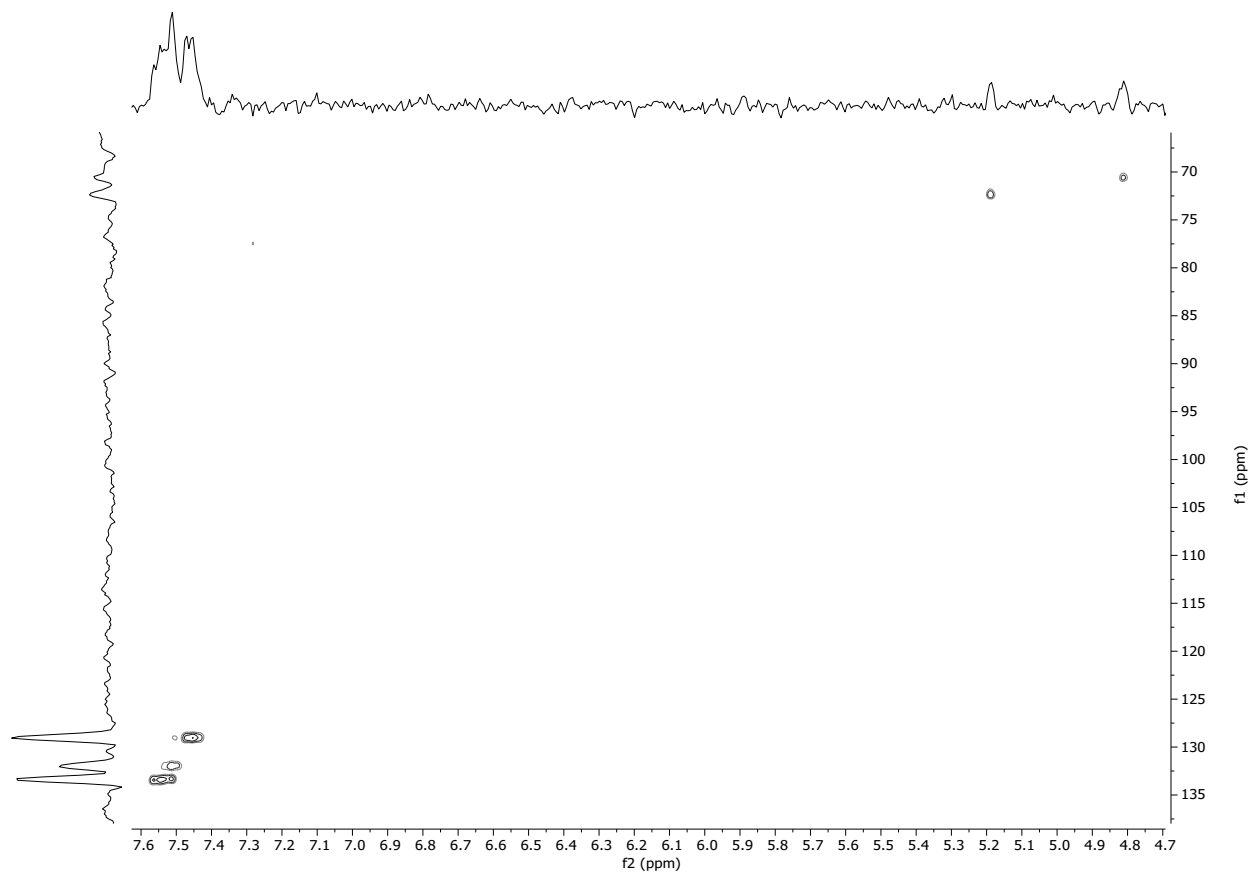

**Fig. S13.**  $^{13}\text{C}$ - $^1\text{H}$  HMBC NMR spectrum of  $[(\text{AuCl})_2(\mu\text{-dppo})]$  in  $\text{CDCl}_3$ .

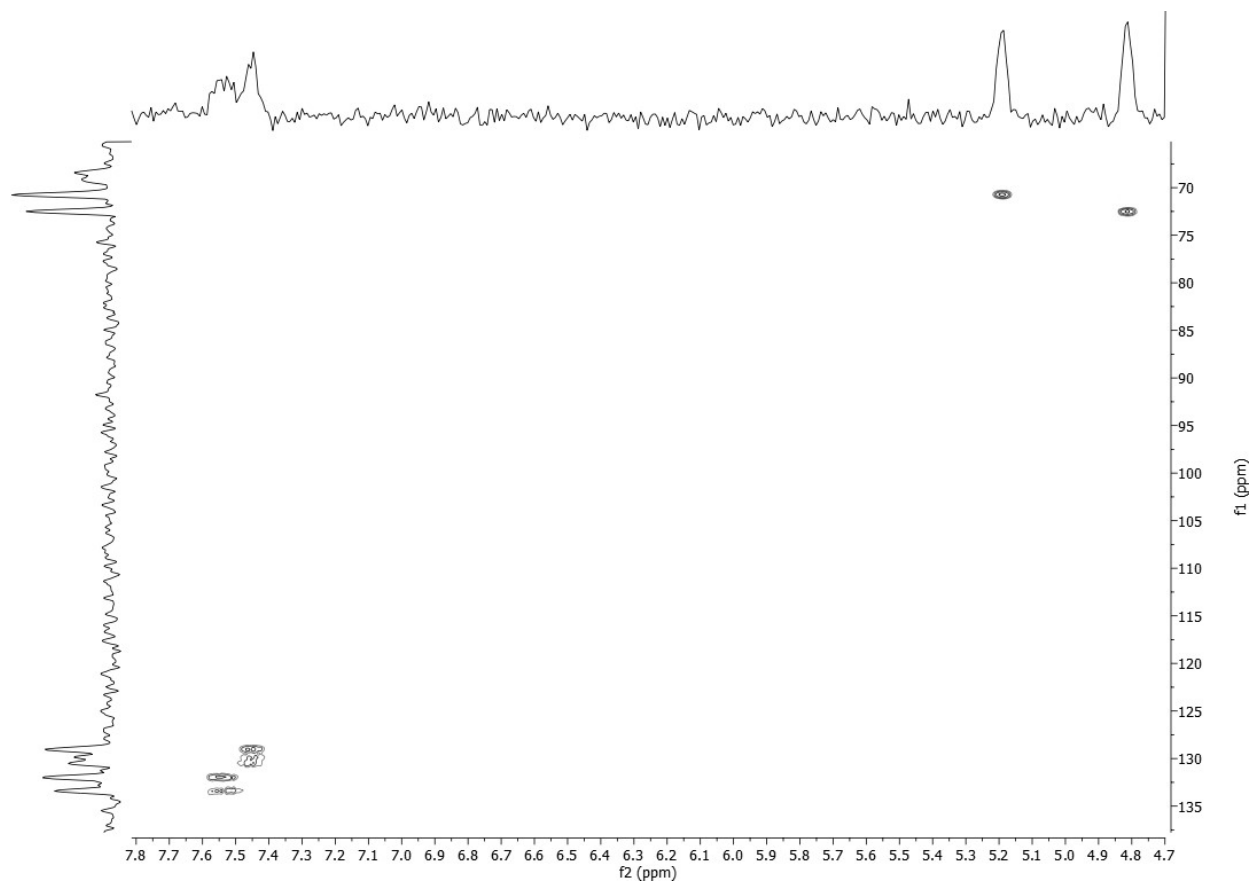

**Fig. S14.**  $^{13}\text{C}$ - $^1\text{H}$  HSQC NMR spectrum of  $[(\text{AuCl})_2(\mu\text{-dppo})]$  in  $\text{CDCl}_3$ .

**Table S1.** Crystallographic data for [(AuCl)<sub>2</sub>(μ-dppr)] and [(AuCl)<sub>2</sub>(μ-dppo)].

|                           | <b>[(AuCl)<sub>2</sub>(μ-dppr)]</b>                                               | <b>[(AuCl)<sub>2</sub>(μ-dppo)]</b>                                              |
|---------------------------|-----------------------------------------------------------------------------------|----------------------------------------------------------------------------------|
| formula                   | C <sub>34</sub> H <sub>28</sub> Au <sub>2</sub> Cl <sub>2</sub> P <sub>2</sub> Ru | C <sub>34</sub> H <sub>28</sub> Au <sub>2</sub> Cl <sub>2</sub> OsP <sub>2</sub> |
| fw                        | 1064.41                                                                           | 1153.54                                                                          |
| crystal system            | monoclinic                                                                        | monoclinic                                                                       |
| space group               | P2 <sub>1</sub> /n                                                                | P2 <sub>1</sub> /n                                                               |
| <i>a</i> , Å              | 8.7596(7)                                                                         | 8.7482(2)                                                                        |
| <i>b</i> , Å              | 16.7100(12)                                                                       | 16.7111(5)                                                                       |
| <i>c</i> , Å              | 10.6881(7)                                                                        | 10.6925(3)                                                                       |
| <i>α</i> , deg            | 90                                                                                | 90                                                                               |
| <i>β</i> , deg            | 94.805(6)                                                                         | 94.880(2)                                                                        |
| <i>γ</i> , deg            | 90                                                                                | 90                                                                               |
| <i>V</i> , Å <sup>3</sup> | 1559.0(2)                                                                         | 1557.49(7)                                                                       |
| <i>Z</i>                  | 2                                                                                 | 2                                                                                |
| cryst. size, mm           | 0.453 x 0.400 x 0.214                                                             | 0.517 x 0.412 x 0.188                                                            |
| cryst. color              | Yellow                                                                            | Colorless                                                                        |
| radiation                 | 0.71073                                                                           | 0.71073                                                                          |
| temp, K                   | 100.0(1)                                                                          | 100.1(1)                                                                         |
| 2θ range, deg             | 4.536-61.136                                                                      | 4.534-61.112                                                                     |
| data collected            |                                                                                   |                                                                                  |
| <i>h</i>                  | -12 to 12                                                                         | -12 to 12                                                                        |
| <i>k</i>                  | -23 to 23                                                                         | -23 to 23                                                                        |
| <i>l</i>                  | -13 to 14                                                                         | -15 to 15                                                                        |
| no. of data collected     | 15987                                                                             | 15974                                                                            |
| no. of unique data        | 4527                                                                              | 4523                                                                             |
| abs. corr.                | SCALE3 ABSPACK                                                                    | SCALE3 ABSPACK                                                                   |
| final <i>R</i> indices    |                                                                                   |                                                                                  |
| R1                        | 0.0251                                                                            | 0.0321                                                                           |
| wR2                       | 0.0663                                                                            | 0.0814                                                                           |
| goodness of fit           | 1.103                                                                             | 1.050                                                                            |



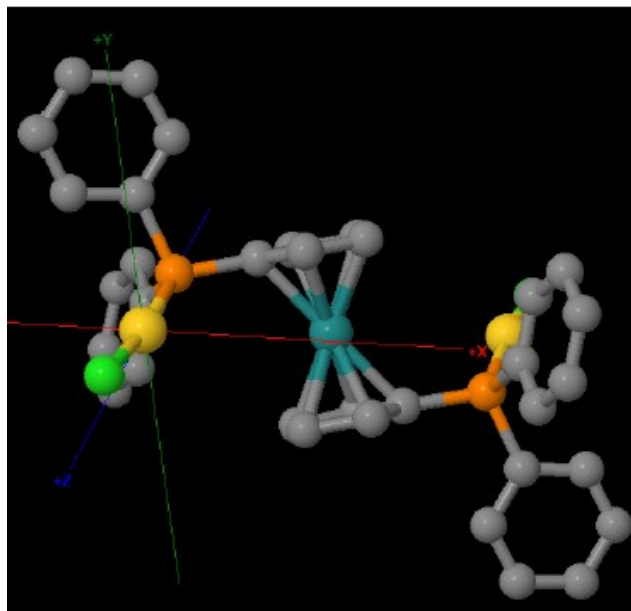

| %V Free | %V Buried | %V Tot/V Ex |
|---------|-----------|-------------|
| 64.5    | 35.5      | 99.9        |

| Quadrant | V f  | V b  | V t  | %V f | %V b |
|----------|------|------|------|------|------|
| SW       | 30.3 | 14.6 | 44.9 | 67.5 | 32.5 |
| NW       | 28.3 | 16.6 | 44.9 | 63.1 | 36.9 |
| NE       | 31.3 | 13.5 | 44.9 | 69.8 | 30.2 |
| SE       | 25.8 | 19.1 | 44.9 | 57.5 | 42.5 |

### Steric Map

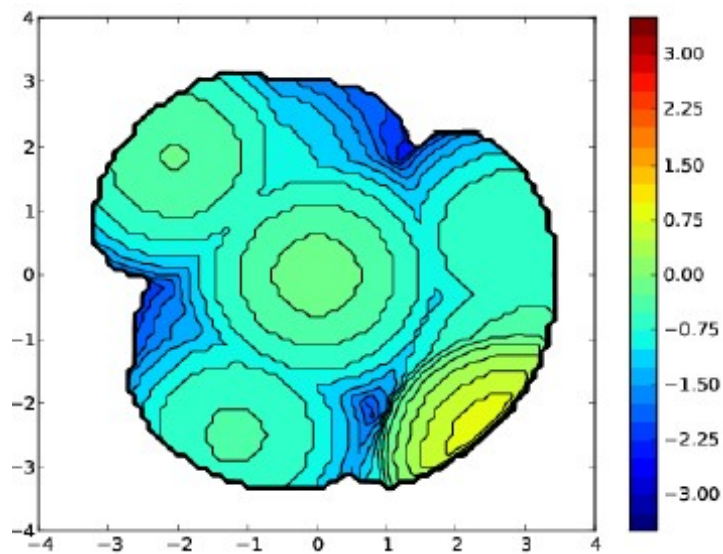

Fig. S15. SambVca results for  $[(\text{AuCl})_2(\mu\text{-dppr})]$ .

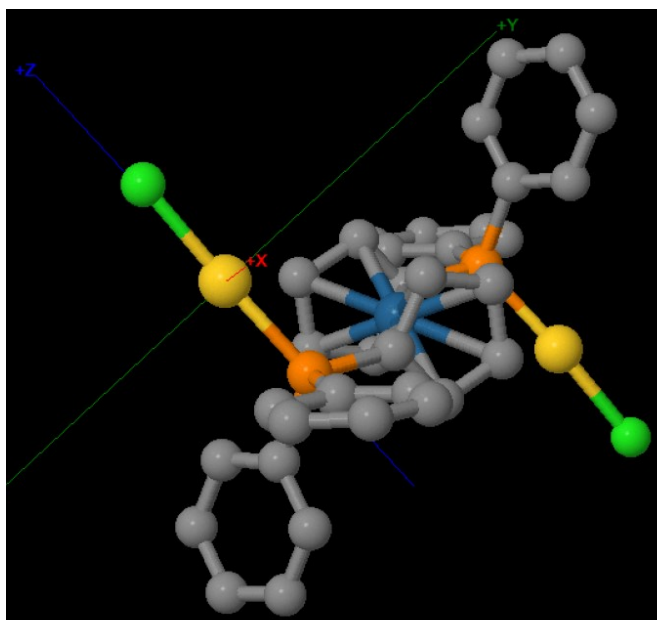

| %V Free | %V Buried | %V Tot/V Ex |
|---------|-----------|-------------|
| 64.4    | 35.6      | 99.9        |

| Quadrant | V f  | V b  | V t  | %V f | %V b |
|----------|------|------|------|------|------|
| SW       | 28.8 | 16.1 | 44.9 | 64.2 | 35.8 |
| NW       | 24.9 | 20.0 | 44.9 | 55.5 | 44.5 |
| NE       | 32.1 | 12.7 | 44.9 | 71.7 | 28.3 |
| SE       | 29.7 | 15.2 | 44.9 | 66.2 | 33.8 |

Steric Map

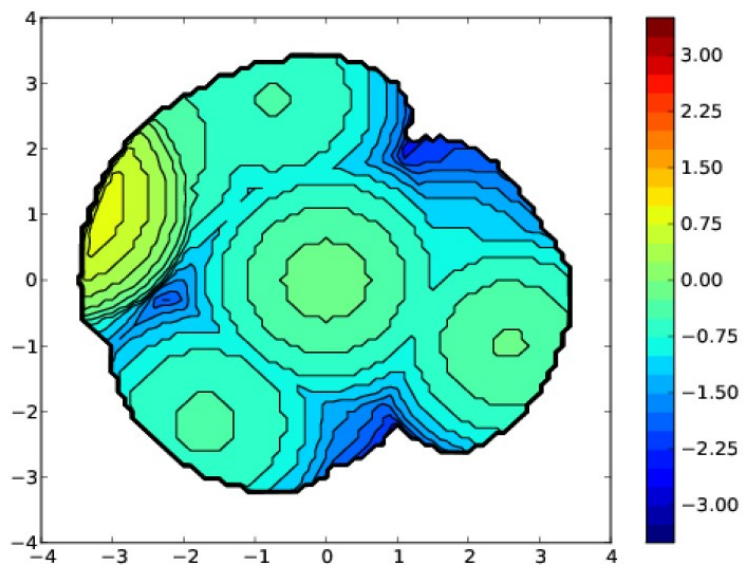

Fig. S16. SambVca results for  $[(\text{AuCl})_2(\mu\text{-dppo})]$ .

### Characterization of furan products

2,5-diphenylfuran:  $^1\text{H}$  and  $^{13}\text{C}\{^1\text{H}\}$  NMR spectra were in good agreement with the literature.<sup>1</sup>

2,5-di(3-tolyl)furan:  $^1\text{H}$  and  $^{13}\text{C}\{^1\text{H}\}$  NMR spectra were in good agreement with the literature.<sup>2</sup>

2,5-di(4-*tert*-butylphenyl)furan:  $^1\text{H}$  and  $^{13}\text{C}\{^1\text{H}\}$  NMR spectra were in good agreement with the literature.<sup>2</sup>

2,5-di-*n*-pentylfuran:  $^1\text{H}$  and  $^{13}\text{C}\{^1\text{H}\}$  NMR spectra were in good agreement with the literature.<sup>3</sup>

2,5-dicyclopropylfuran: The  $^1\text{H}$  NMR spectrum was in good agreement with the reported spectrum.<sup>4</sup>  $^{13}\text{C}\{^1\text{H}\}$  NMR:  $\delta$  (ppm) 152.6 (s, No DEPT), 106.1 (s, DEPT +), 10.5 (s, DEPT +), 6.5 (s, DEPT -).

2,5-dibenzylfuran:  $^1\text{H}$  NMR (400 MHz,  $\text{CDCl}_3$ )  $\delta$  7.24 (m, 4H, -Ph), 7.17 (m, 6H, -Ph), 5.94 (s, 2H, =CH), 3.79 (m, 4H, -CH<sub>2</sub>-).  $^{13}\text{C}\{^1\text{H}\}$  NMR (101 MHz,  $\text{CDCl}_3$ )  $\delta$  153.7 (s, No DEPT), 137.6 (s, No DEPT), 130.1 (s, DEPT +), 128.8 (s, DEPT +), 124.0 (s, No DEPT), 108.7 (s, DEPT +), 38.9 (s, DEPT -).

2,5-di(4-pentynyl)furan:  $^1\text{H}$  NMR (400 MHz,  $\text{CDCl}_3$ )  $\delta$  6.02 (s, 2H, =CH), 2.74 (m, 4H, -CH<sub>2</sub>-), 2.42 (m, 4H, -CH<sub>2</sub>-), 2.10 (t,  $J$  = 2.6 Hz, 2H,  $\equiv\text{CH}$ ), 1.82 (m, 4H, -CH<sub>2</sub>-).  $^{13}\text{C}\{^1\text{H}\}$  NMR (101 MHz,  $\text{CDCl}_3$ )  $\delta$  152.2 (s, No DEPT), 107.1 (s, DEPT +), 84.1 (s, no DEPT), 70.4 (s, DEPT +), 28.1 (s, DEPT -), 25.7 (s, DEPT -), 17.5 (s, DEPT -).

2,5-di(5-hexynyl)furan:  $^1\text{H}$  NMR (400 MHz,  $\text{CDCl}_3$ )  $\delta$  5.96 (s, 2H, =CH), 2.69 (m, 4H, -CH<sub>2</sub>-), 2.44 (m, 4H, -CH<sub>2</sub>-), 2.00 (t,  $J$  = 2.5 Hz, 2H,  $\equiv\text{CH}$ ), 1.71 (m, 4H, -CH<sub>2</sub>-), 1.52 (m, 2H, -CH<sub>2</sub>-).  $^{13}\text{C}\{^1\text{H}\}$  NMR (101 MHz,  $\text{CDCl}_3$ )  $\delta$  153.0 (s, No DEPT), 106.3 (s, DEPT +), 84.0 (s, no DEPT), 68.7 (s, DEPT +), 29.4 (s, DEPT -), 27.3 (s, DEPT -), 26.3 (s, DEPT -), 18.3 (s, DEPT -).

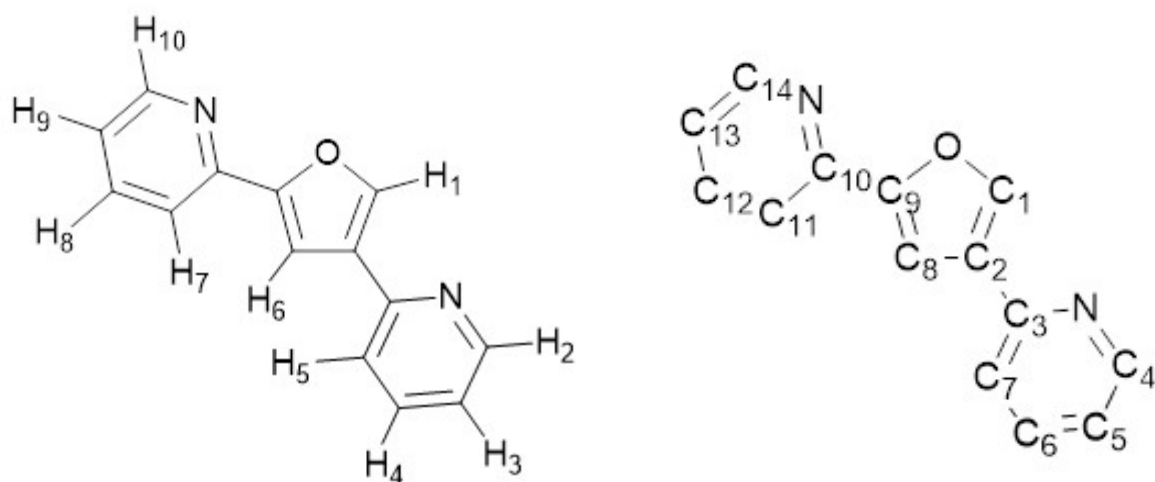

**Fig. S17.** Proton (left) and carbon (right) numbering scheme for 2,4-di(2-pyridyl)furan.

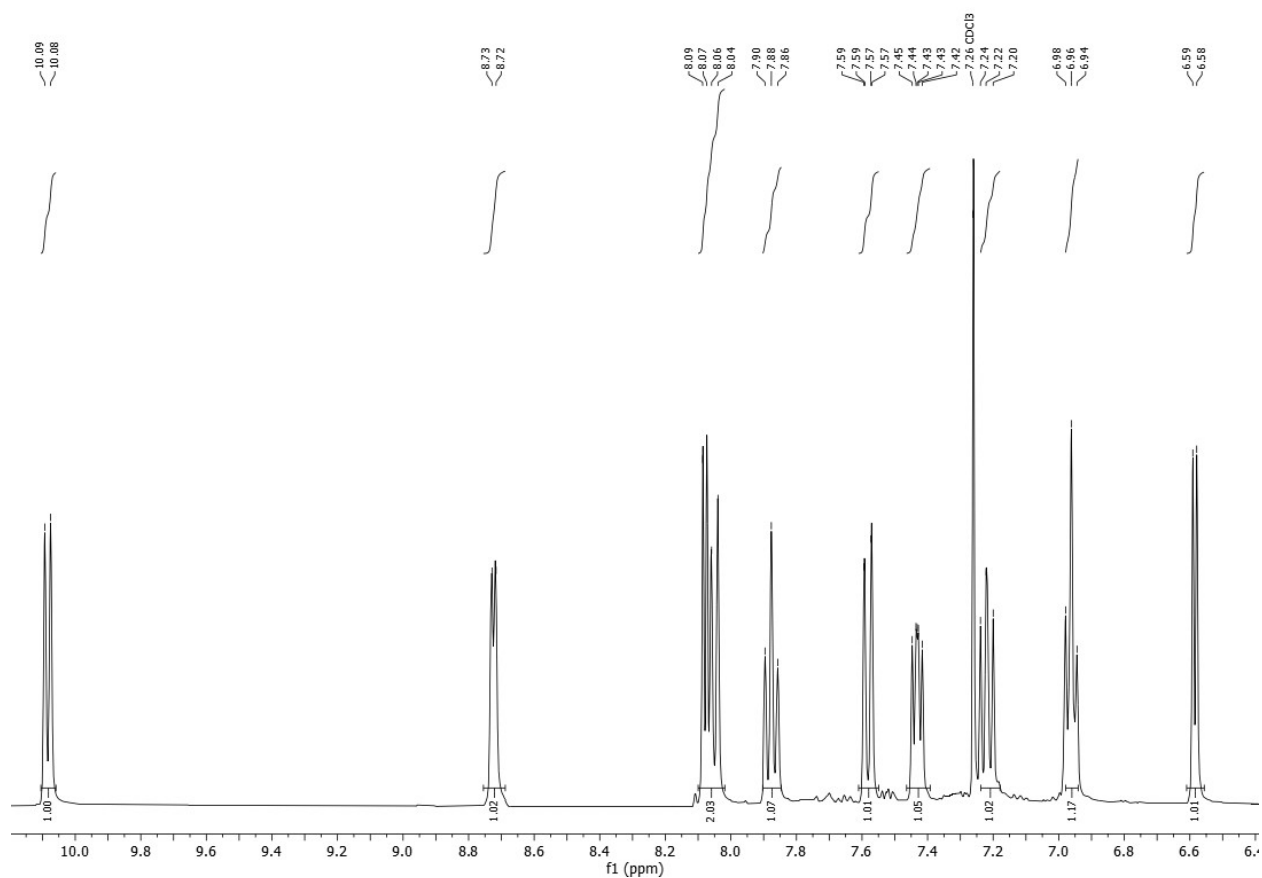

$^1\text{H}$  NMR (400 MHz,  $\text{CDCl}_3$ )  $\delta$  10.08 (d,  $J = 7.1$  Hz, 1H, H2), 8.72 (d,  $J = 4.9$  Hz, 1H, H10), 8.06 (dd,  $J = 12.4, 6.3$  Hz, 2H), 7.88 (t,  $J = 7.8$  Hz, 1H), 7.58 (dd,  $J = 8.7, 1.2$  Hz, 1H), 7.46 – 7.39 (m, 1H), 7.21 (d,  $J = 8.7$  Hz, 1H), 6.95 (d,  $J = 7.0$  Hz, 1H), 6.59 (d,  $J = 4.8$  Hz, 1H).

**Fig. S18.**  $^1\text{H}$  NMR spectrum of 2,4-di(2-pyridyl)furan in  $\text{CDCl}_3$ .

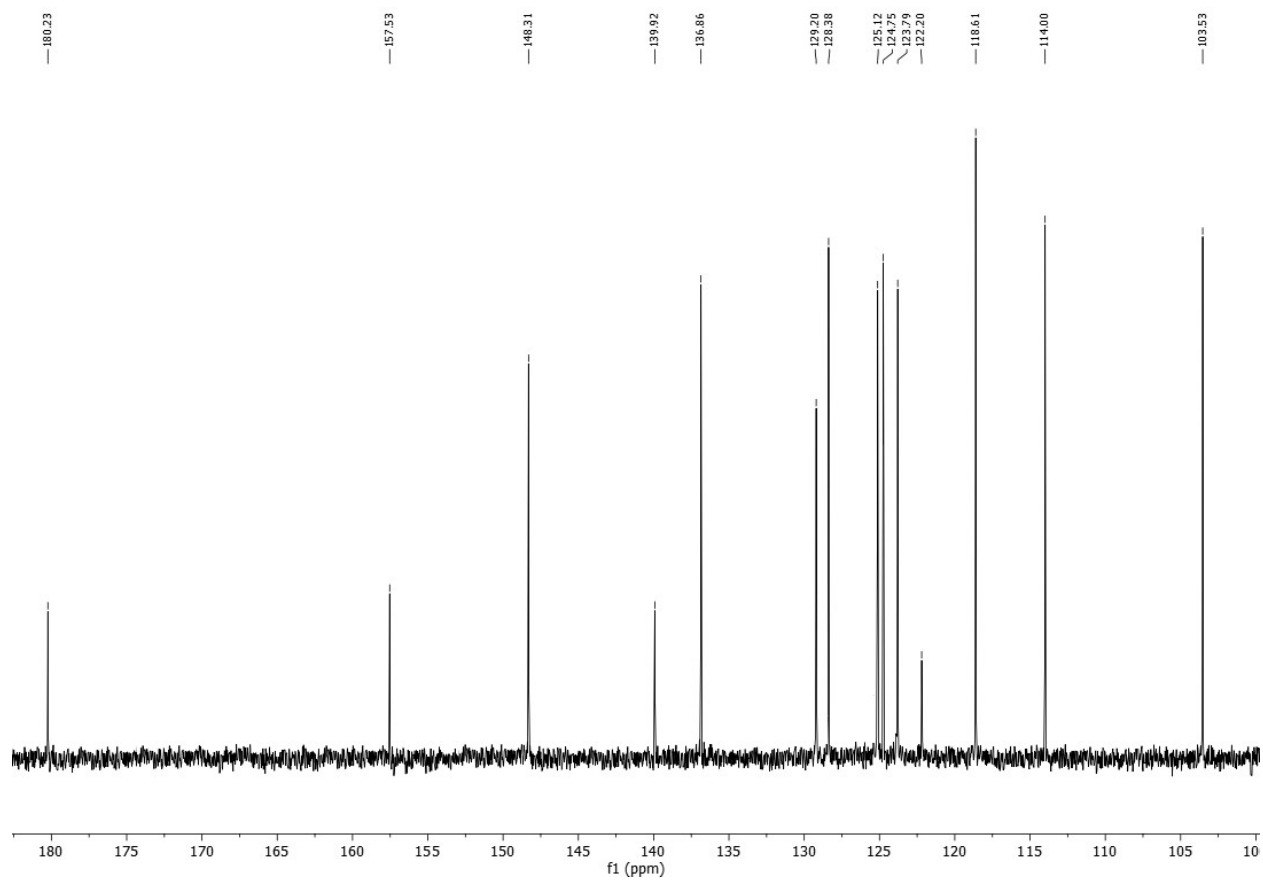

$^{13}\text{C}\{^1\text{H}\}$  NMR (101 MHz,  $\text{CDCl}_3$ )  $\delta$  180.23 (C9), 157.53 (C3), 148.31 (C14), 139.92, 136.86, 129.20 (C4), 128.38, 125.12, 124.75, 123.79, 122.20, 118.61, 114.00, 103.53.

**Fig. S19.**  $^{13}\text{C}\{^1\text{H}\}$  NMR spectrum of 2,4-di(2-pyridyl)furan in  $\text{CDCl}_3$ .

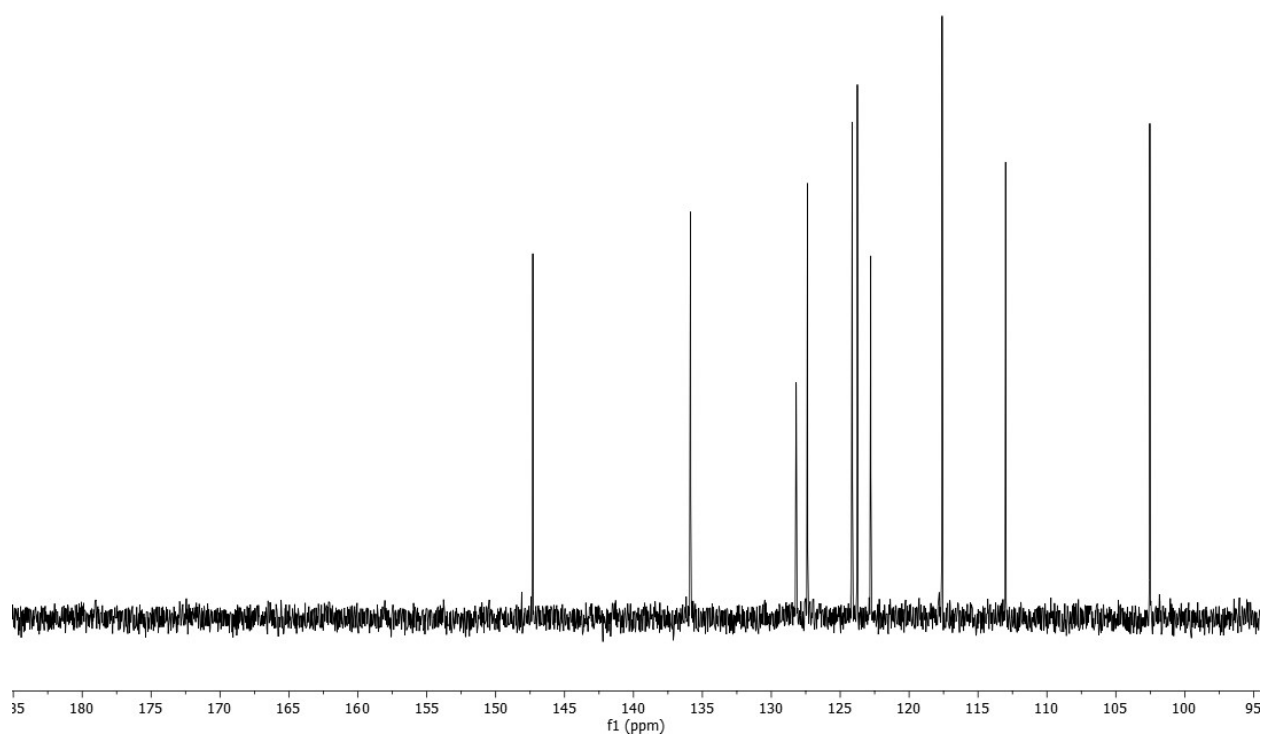

**Fig. S20.**  $^{13}\text{C}$  DEPT NMR spectrum of 2,4-di(2-pyridyl)furan in  $\text{CDCl}_3$ .

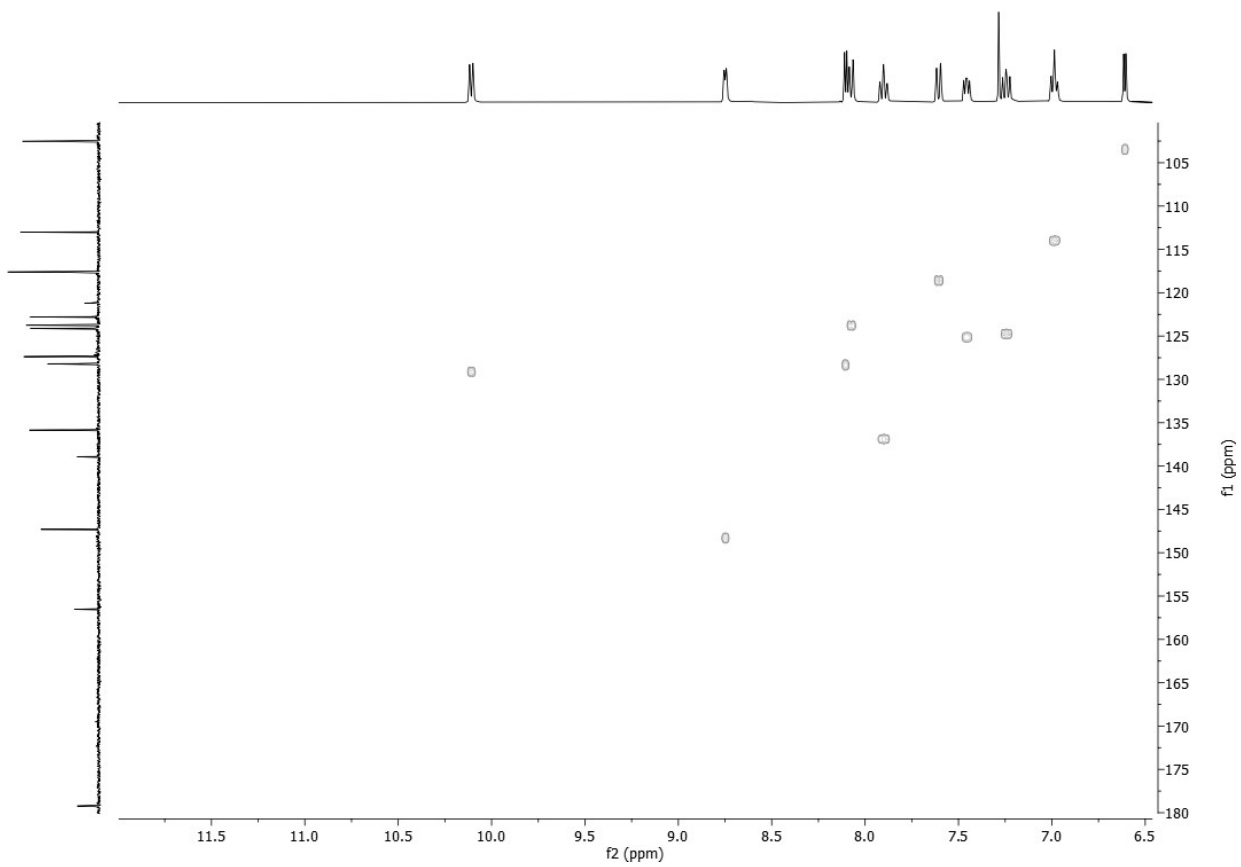

**Fig. S21.**  $^{13}\text{C}$ - $^1\text{H}$  HMBC NMR spectrum of 2,4-di(2-pyridyl)furan in  $\text{CDCl}_3$ .



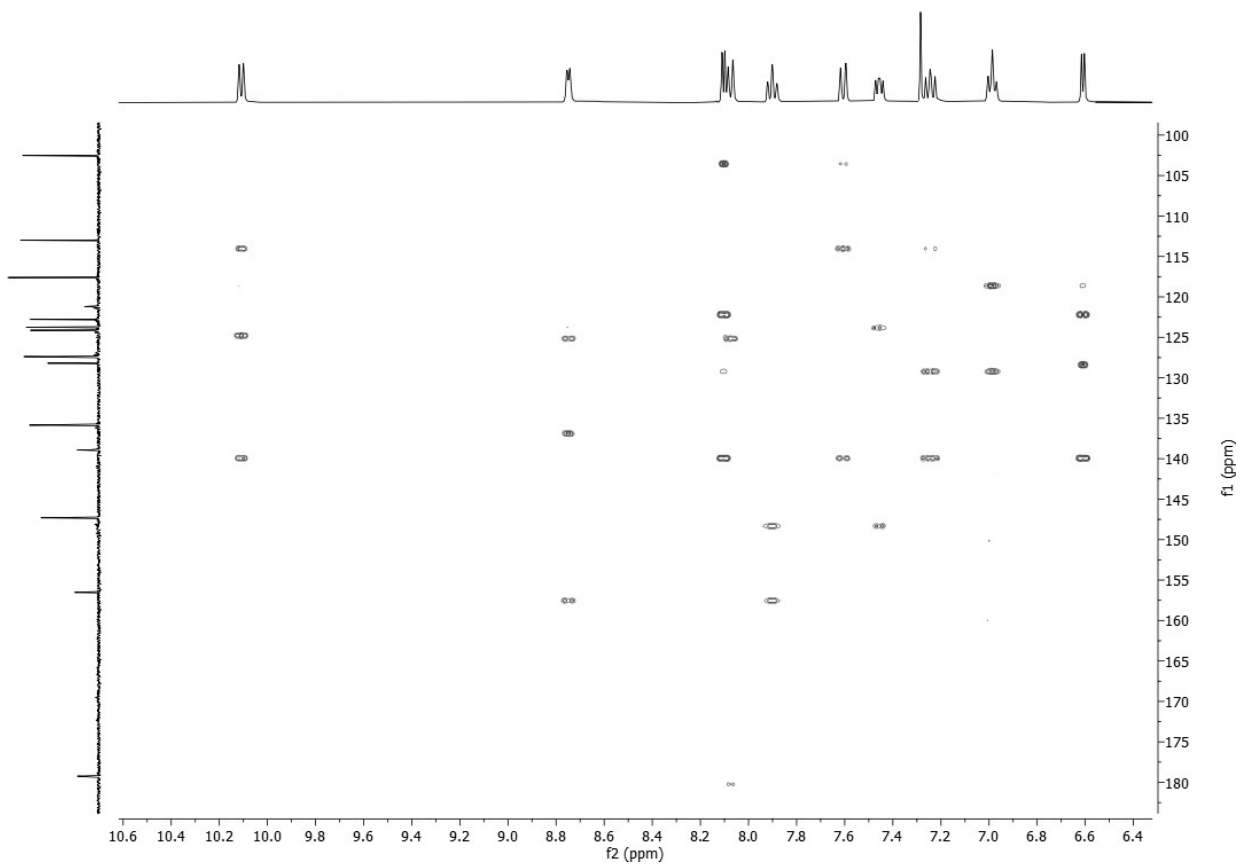

**Fig. S22.**  $^{13}\text{C}$ - $^1\text{H}$  HSQC NMR spectrum of 2,4-di(2-pyridyl)furan in  $\text{CDCl}_3$ .

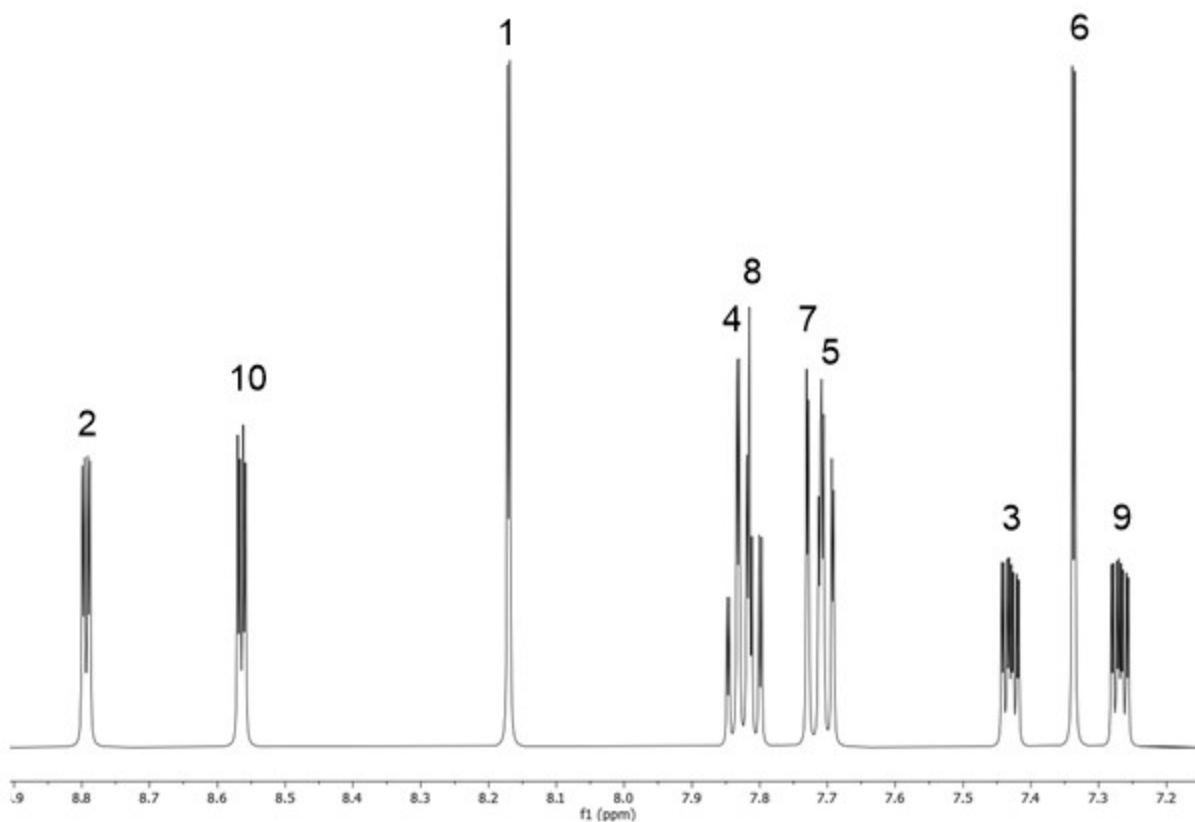

**Fig. S23.** Predicted<sup>5</sup> <sup>1</sup>H NMR spectrum of 2,4-di(2-pyridyl)furan in CDCl<sub>3</sub>.

<sup>1</sup>H NMR (400 MHz, Chloroform-*d*)  $\delta$  8.79 (dd,  $J = 4.0, 1.7$  Hz, 1H), 8.56 (dd,  $J = 4.0, 1.7$  Hz, 1H), 8.17 (d,  $J = 1.8$  Hz, 1H), 7.82 (qd,  $J = 7.3, 1.6$  Hz, 2H), 7.76 – 7.67 (m, 2H), 7.43 (ddd,  $J = 7.2, 4.0, 1.5$  Hz, 1H), 7.33 (s, OH), 7.27 (ddd,  $J = 7.0, 4.0, 1.5$  Hz, 1H).

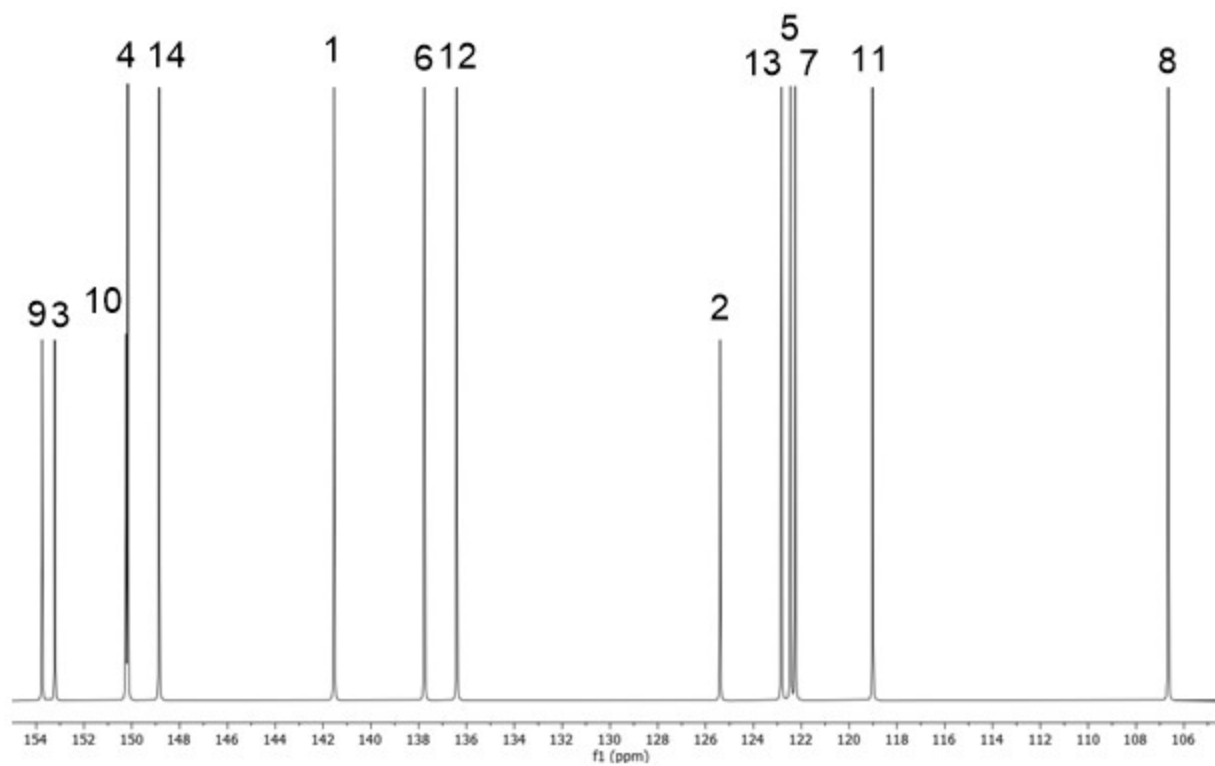

**Fig. S24.** Predicted<sup>5</sup>  $^{13}\text{C}\{^1\text{H}\}$  NMR spectrum of 2,4-di(2-pyridyl)furan in  $\text{CDCl}_3$ .

$^{13}\text{C}$  NMR (100 MHz, Chloroform-*d*)  $\delta$  153.75, 153.22, 150.24, 150.17, 148.86, 141.54, 137.76, 136.41, 125.39, 122.83, 122.46, 122.25, 119.02, 106.65.

## References

- 1 D. Alickmann, R. Fröhlich, A. H. Maulitz and E. U. Würthwein, *Eur. J. Org. Chem.*, 2002, 1523–1537.
- 2 M. Zhang, H. F. Jiang, H. Neumann, M. Beller and P. H. Dixneuf, *Angew. Chem., Int. Ed.*, 2009, **48**, 1681–1684.
- 3 K. Tanaka, T. Shoji and M. Hirano, *Eur. J. Org. Chem.*, 2007, 2687–2699.
- 4 Spectrum available from Enamine Ltd. (EN300-378678.nmr.y2020).
- 5 Predicted using MestReNova ver. 14.3.0-30573.
